# Supplementary material
Source: Springer Nature journal article supplement (https://www.springermedizin.de/resource/supplementary/12943_2014_1348_MOESM7_ESM.pdf/9552730)

**A**

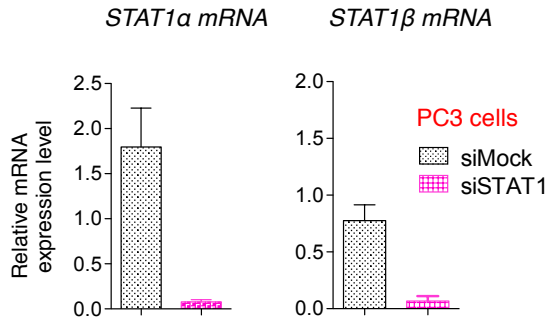

**B**

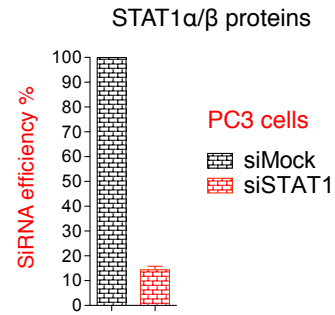

**C**

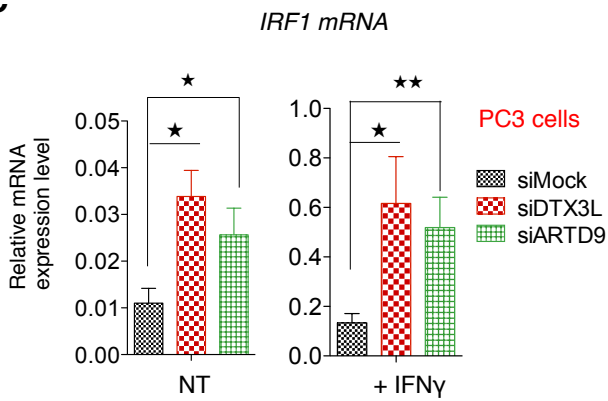

**D**

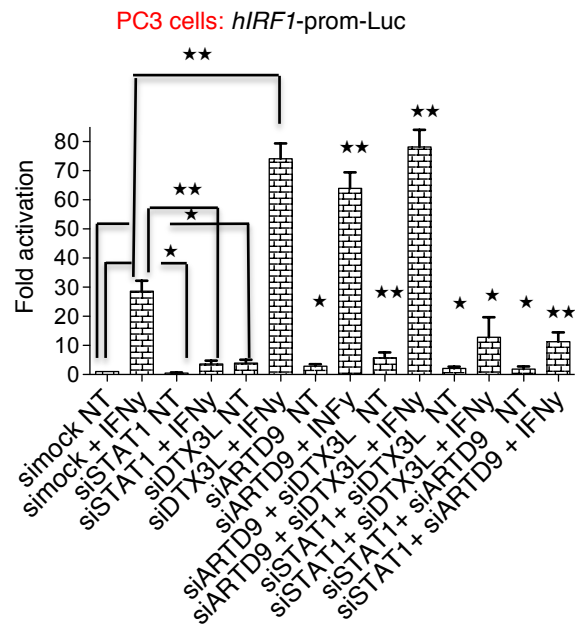

**E**

PC3 cells: *hIRF1*-prom-Luc

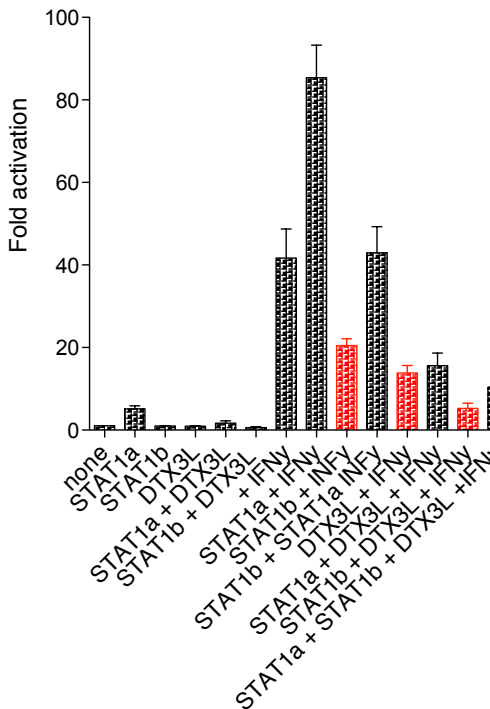

**F**

PC3 cells: *hIRF1*-prom-Luc

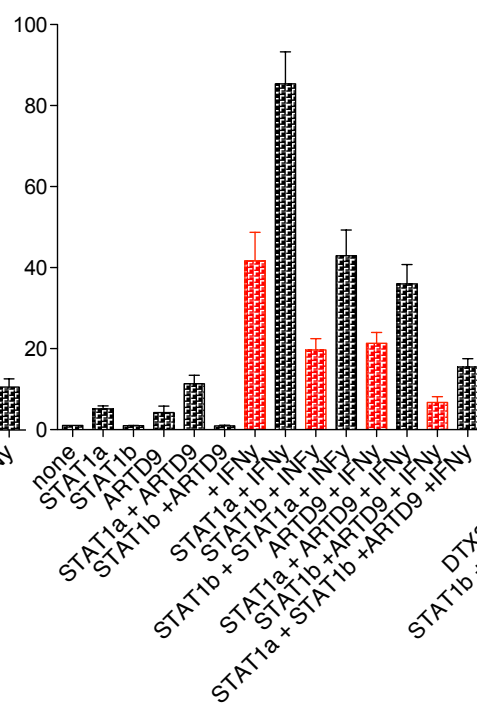

**G**

PC3 cells: *hIRF1*-prom-Luc

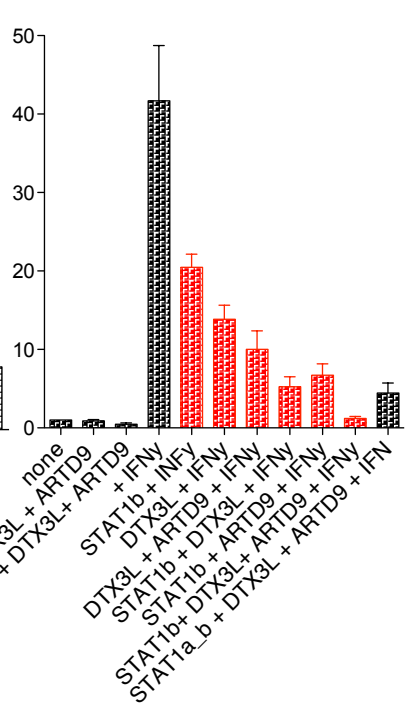

Supplement: MOESM7 [file 9552730]
